# Supplementary material for: Synthesis and charge-transport properties of novel π-conjugated polymers incorporating core-extended naphtho[2,1-b:3,4-b′]dithiophene diimides
Source: Royal Society of Chemistry journal article supplement (doi:10.1039/d3py01186k), 2023-11-28
Supplement: d3py01186k1.pdf [file d3py01186k1.pdf]

## ***Electronic Supplementary Information***

### **Synthesis and Charge-Transport Properties of**

### **Novel $\pi$ -Conjugated Polymers Incorporating Core-Extended Naphtho[2,1-*b*:3,4-*b'*]dithiophene Diimides**

Lingli Zhao<sup>a,#</sup>, Yanyan Cao<sup>b,#</sup>, Hanwen Qin<sup>a</sup>, Xi He<sup>a</sup>, Zhiyuan Zhao<sup>b,\*</sup>, Yunlong Guo<sup>b</sup>, Huajie Chen<sup>a,\*</sup>

<sup>a</sup>Key Laboratory of Environmentally Friendly Chemistry and Applications of Ministry of Education, College of Chemistry, Xiangtan University, Xiangtan 411105, China. E-mail: [chenhjoe@163.com](mailto:chenhjoe@163.com)

<sup>b</sup>Beijing National Laboratory for Molecular Sciences, Key Laboratory of Organic Solids, Institute of Chemistry, Chinese Academy of Sciences, Beijing 100190, China. E-mail: [zhaozhiyuan@iccas.ac.cn](mailto:zhaozhiyuan@iccas.ac.cn)

<sup>#</sup>L. Zhao and Y. Cao contributed equally to this work.

#### **1. Measurement**

The <sup>1</sup>H and <sup>13</sup>C NMR spectra were collected on a Bruker AVANCE 400 using tetramethylsilane (TMS) as the interval standard. Fourier transform infrared spectroscopy (FT-IR) was recorded on a NICOLET 6700 spectrometer in the range from 600 to 4000 cm<sup>-1</sup>. Thermogravimetric analysis (TGA) was recorded on a TGA Q50 V20.13 Build 39 with a heating rate of 20 °C min<sup>-1</sup> from 25 to 600 °C. Differential scanning calorimetry (TA Instruments DSC-25) was conducted for thermal transition from 25 to 400 °C at a heating rate of 20 °C min<sup>-1</sup>. Mass Spectrometry (MALDI-TOF-MS) was measured on an Orbitrap Fusion Lumos instrument. Liquid Chromatograph Mass Spectrometer (LC-MS) were determined on Agilent 1260 Infinity II LC System and Agilent 6230B TOF. High-temperature (150 °C) gel-permeation chromatography were conducted on a Agilent GPC instrument (Polymer Labs PL 220 system), which adopted 1,2,4-trichlorobenzene and polystyrene as the eluent and standard sample, respectively. UV-Vis absorption spectra of all the samples in the chloroform solutions and as the thin films casted onto the quartz glass were measured on an Agilent Cary 60 UV-Vis spectrophotometer. Cyclic voltammetry (CV) was performed on an electrochemistry workstation (CHI660E, Chen hua Shanghai) using a three-electrode cell system. To examine small molecule 4a, the electrochemical cell

contains a glassy carbon electrode, a Pt wire, and an Ag/AgCl (KCl, Sat'd) electrode. To characterize the redox potentials of both polymers, a Pt disk coated with polymer film, a Pt wire, and an Ag/AgCl (KCl, Sat'd) electrode were used as the working electrode, counter electrode, and reference electrode, respectively. Anhydrous and N<sub>2</sub>-saturated tetrabutylammonium hexafluorophosphate (TBAPF<sub>6</sub>, 0.1 M) solutions in chloroform and in acetonitrile were used as the supporting electrolytes to measure small molecules and polymers, respectively.

Under room temperature, a suitable single crystal of 4a was obtained by slow evaporation of the corresponding solution in CH<sub>2</sub>Cl<sub>2</sub>: petroleum ether (V: V = 1:10). Single-crystal X-ray data was collected on a XtaLAB AFC12 (RINC): Kappa single diffractometer using graphite-monochromated Cu K $\alpha$  radiation ( $\lambda$  = 1.54184 Å). Using Olex2<sup>[1]</sup>, the structures were solved with the SHELXS <sup>[2]</sup> structure solution program using Direct Methods and refined with the SHELXL <sup>[3]</sup> refinement package using Least Squares minimization.

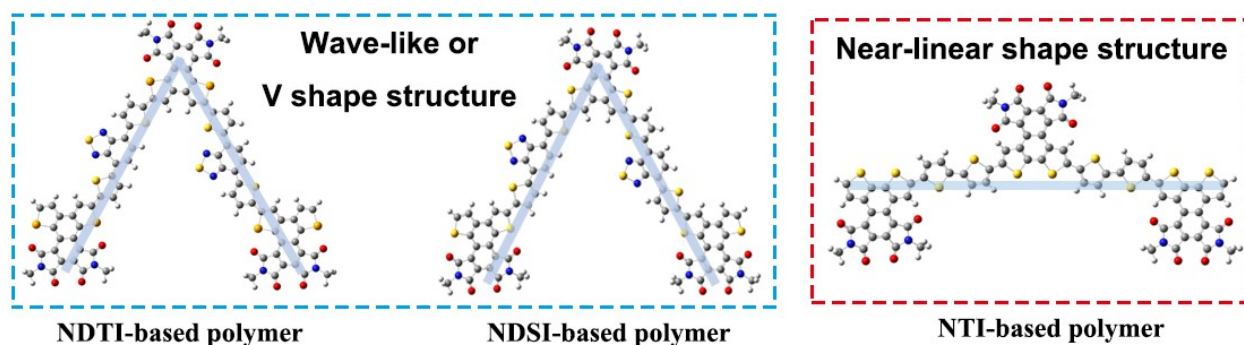

**Fig. S1** Ground-state geometries of NDTI-/ NDSI-based polymer models and NTI-based polymer model calculated at the level of B3LYP/6-31G.

## 2. GPC characterization

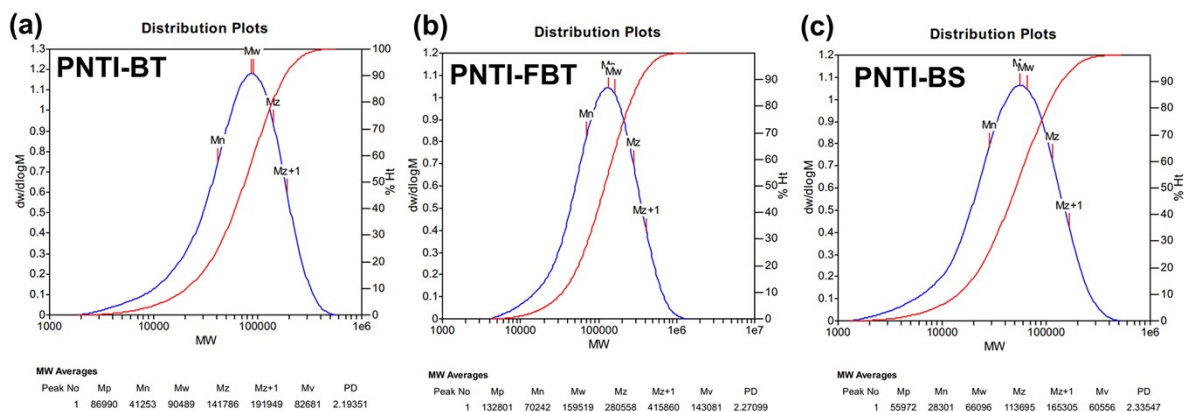

Fig. S2 GPC curves of the NTI-based copolymers.

### 3. DSC characterization

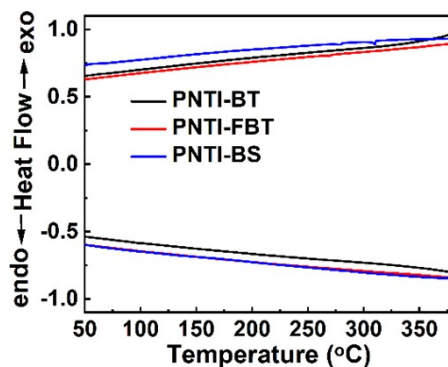

Fig. S3 DSC curves of the NTI-based copolymers under N<sub>2</sub> atmosphere.

### 4. TGA characterization

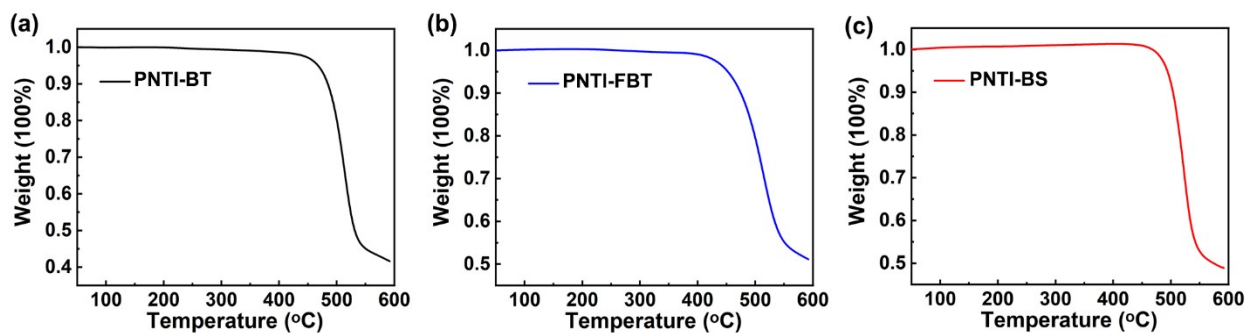

Fig. S4 TGA curves of the NTI-based copolymers under N<sub>2</sub> atmosphere.

### 5. FT-IR spectrometer

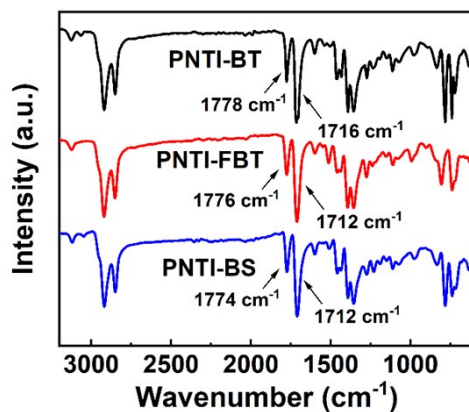

Fig. S5 FT-IR spectra of the NTI-based copolymers.

## 6. Comparison of $^1\text{H}$ NMR signals

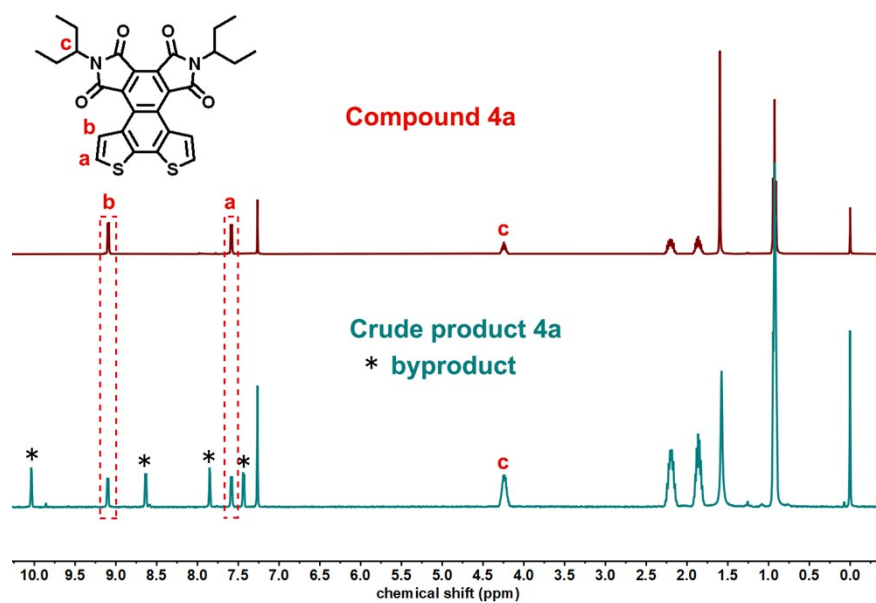

**Fig. S6** Comparison of  $^1\text{H}$  NMR signals between the compound 4a and the crude product of 4a and a few byproducts.

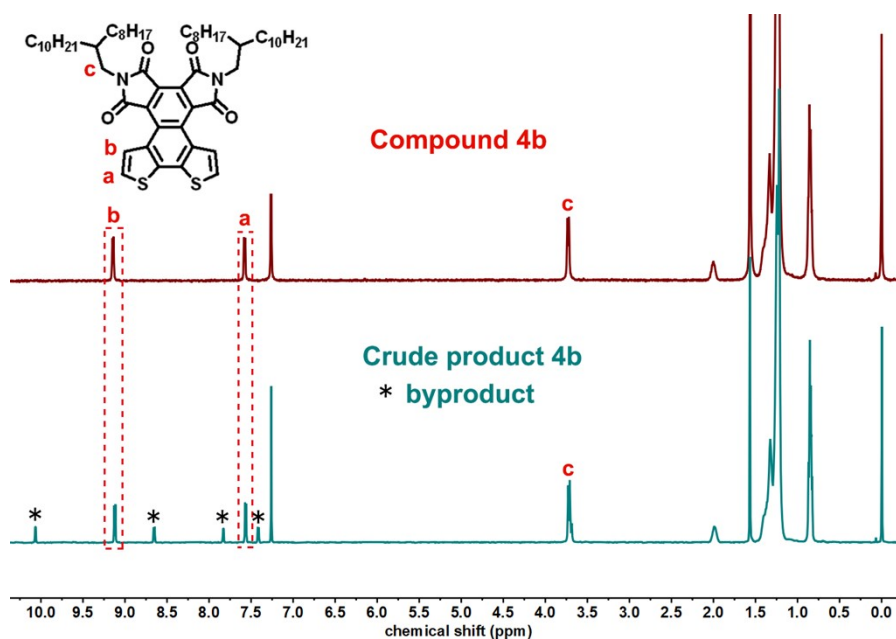

**Fig. S7** Comparison of  $^1\text{H}$  NMR signals between the compound 4b and the crude product of 4b and a few byproducts.

## 7. Single Crystal Parameters

**Table S1** Crystal data and structure refinement for 4a

|                                             |                                                                                              |
|---------------------------------------------|----------------------------------------------------------------------------------------------|
| Identification code                         | 4a                                                                                           |
| Empirical formula                           | C <sub>28</sub> H <sub>24</sub> Br <sub>2</sub> N <sub>2</sub> O <sub>4</sub> S <sub>2</sub> |
| Formula weight                              | 676.43                                                                                       |
| Temperature/K                               | 150.00(10)                                                                                   |
| Crystal system                              | monoclinic                                                                                   |
| Space group                                 | P2 <sub>1</sub> /c                                                                           |
| a/Å                                         | 15.37851(9)                                                                                  |
| b/Å                                         | 22.32456(14)                                                                                 |
| c/Å                                         | 7.70669(5)                                                                                   |
| $\alpha$ /°                                 | 90                                                                                           |
| $\beta$ /°                                  | 91.6555(5)                                                                                   |
| $\gamma$ /°                                 | 90                                                                                           |
| Volume/Å <sup>3</sup>                       | 2644.74(3)                                                                                   |
| Z                                           | 4                                                                                            |
| $\rho_{\text{calc}}$ /g/cm <sup>3</sup>     | 1.699                                                                                        |
| $\mu$ /mm <sup>-1</sup>                     | 5.692                                                                                        |
| F(000)                                      | 1360.0                                                                                       |
| Crystal size/mm <sup>3</sup>                | 0.14 × 0.12 × 0.11                                                                           |
| Radiation                                   | Cu K $\alpha$ ( $\lambda$ = 1.54184)                                                         |
| 2 $\theta$ range for data collection/°      | 5.75 to 133.2                                                                                |
| Index ranges                                | -18 ≤ h ≤ 18, -26 ≤ k ≤ 26, -9 ≤ l ≤ 5                                                       |
| Reflections collected                       | 25803                                                                                        |
| Independent reflections                     | 4680 [ $R_{\text{int}}$ = 0.0262, $R_{\text{sigma}}$ = 0.0176]                               |
| Data/restraints/parameters                  | 4680/45/405                                                                                  |
| Goodness-of-fit on F <sup>2</sup>           | 1.041                                                                                        |
| Final R indexes [ $I \geq 2\sigma(I)$ ]     | $R_1$ = 0.0271, $wR_2$ = 0.0722                                                              |
| Final R indexes [all data]                  | $R_1$ = 0.0286, $wR_2$ = 0.0732                                                              |
| Largest diff. peak/hole / e Å <sup>-3</sup> | 0.63/-0.41                                                                                   |
| CCDC number                                 | 2302738                                                                                      |

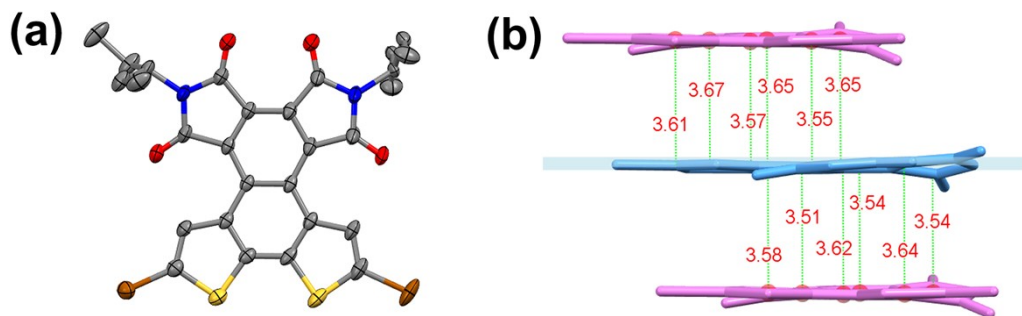

**Fig. S8** (a) Thermal ellipsoid plot of 4a at the 50% probability level. Nitrogen, sulfur, oxygen, and carbon atoms are indicated as blue, yellow, red, and gray color, respectively. The hydrogen atoms are omitted for clarify; (b) Crystal packing distances determined from the adjacent molecules.

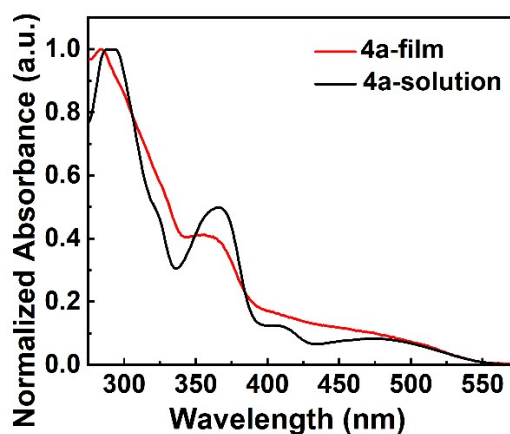

**Fig. S9** Normalized absorption spectra of the NTI-based model compound 4a in  $\text{CHCl}_3$  solution and as thin film.

## 8. DFT Calculations

To gain deeper insight to the chemical properties of model compounds 4a and polymer PNTI-BT, PNTI-FBT and PNTI-BS, density functional theory (DFT) calculations and time-dependent DFT (TD-DFT) were conducted by using Gaussian 09 program [4]. For 4a, both the structural optimization and frequency analysis calculation were carried out at B3LYP/6-31G level of theory. To get the optimized structure of PNTI-BT, PNTI-FBT and PNTI-BS, 2.5 repeat units were choose to do computation at

B3LYP/6-31G level of theory [5]. The UV-Vis absorption spectra of 4a were performed via time-dependent density functional theory (TD-DFT) calculation at PBE0/Def2TZVP level of theory. The solvent effect of CHCl<sub>3</sub> was taken into consideration by a polarizable continuum model [6].

**Table S2** Theoretical simulation spectral data of 4a

| compound | Excited States | Energy (eV) | Wavelength (nm) | Osc. Strength | Main contributions                                           |
|----------|----------------|-------------|-----------------|---------------|--------------------------------------------------------------|
| 4a       | 1              | 2.1924      | 565.52          | 0.06610       | HOMO→LUMO 98.7%                                              |
|          | 3              | 3.1948      | 388.08          | 0.36280       | HOMO-1→LUMO 74.0%<br>HOMO→LUMO+1 15.3%                       |
|          | 12             | 3.9296      | 315.51          | 0.52740       | HOMO→LUMO+2 51.8%<br>HOMO-1→LUMO+1 36.5%<br>HOMO-7→LUMO 6.8% |
|          | 14             | 4.1096      | 301.69          | 0.07270       | HOMO-7→LUMO 76.7%<br>HOMO-5→LUMO 9.5%<br>HOMO-1→LUMO+1 5.7%  |
|          | 15             | 4.1352      | 299.83          | 0.16320       | HOMO-6→LUMO 73.4%<br>HOMO-2→LUMO+1 18.1%                     |
|          | 16             | 4.2466      | 291.96          | 0.17390       | HOMO→LUMO+3 74.5%<br>HOMO→LUMO+4 8.8%<br>HOMO-1→LUMO+2 8.2%  |
|          | 18             | 4.4603      | 277.97          | 0.05360       | HOMO-3→LUMO+1 74.6%<br>HOMO-13→LUMO 7.8%                     |

## 9. OFET transistor device fabrication

To evaluate the charge transport performance of the NTI-based polymers, organic field-effect transistors (OFETs) with a top-gate/bottom-contact architecture were fabricated on the glass (300 nm) substrate. The source/drain (S/D) electrodes (30 nm Au) were deposited on the the surface of glass substrates by using a standard photolithography technique, with the corresponding channel length ( $L$ ) of 40  $\mu\text{m}$  and width ( $W$ ) of 4500  $\mu\text{m}$ . The substrates were washed by ultrasonication in acetone and isopropanol, followed by the treatment with UV-O<sub>3</sub>. After that, the Au S/D electrodes was modified with pentafluorothiophenol (PFBT) according to the reported methods [7]. The semiconductor layer

was deposited on the surface of the PFBT-modified glass substrates by spin-coating a polymer solution in *o*-dichlorobenzene (10 mg mL<sup>-1</sup>) at a rotation speed of 3000 rpm for 60 s, followed by the thermal treatment in a vacuum oven at 180 °C for 10 min. Next, a polymethyl methacrylate (PMMA,  $M_w = 99.6$  kDa) solution in anhydrous *n*-butyl acetate (70 mg mL<sup>-1</sup>) was spin-coated onto the surface of the semiconducting film. The thickness and dielectric constant of PMMA were determined as around 1000 nm and 2.7, respectively. The samples were further dried at 90°C for 1 h in a vacuum oven in order to remove the organic solvent in the film. Finally, the aluminum gate electrodes ( $\sim 100$  nm) were evaporated onto the surface of the PMMA gate dielectric by using a shadow mask technique. All the devices were measured in ambient air. The electrical characteristics were measured using a Keithley 4200A-SCS Parameter analyzer. The saturation mobility was calculated using the transistor equation:

$$I_{DS} = (W/2L) C_i \mu (V_G - V_T)^2$$

Where  $C_i$  represents the capacitance of the gate dielectric;  $V_G$  and  $V_T$  represent the gate voltage and the threshold voltage, respectively.

## 10. 1D-GIXRD characterization

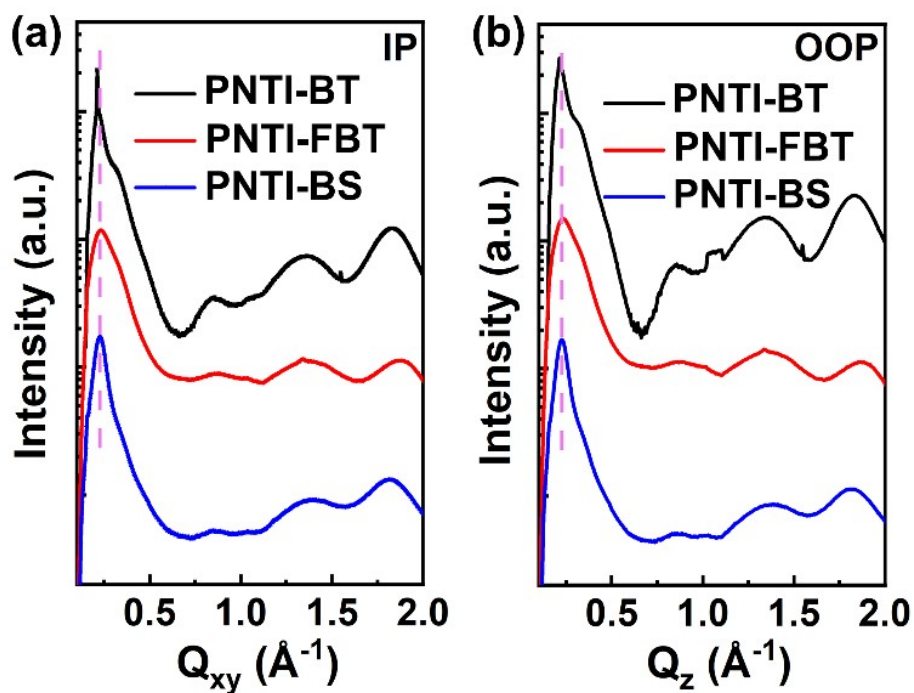

Fig. S10 1D-GIXRD line-cuts of the polymer annealed films deposited on the glass substrate.

## 11. <sup>1</sup>HNMR spectra and <sup>13</sup>CNMR spectra of small molecules and polymers

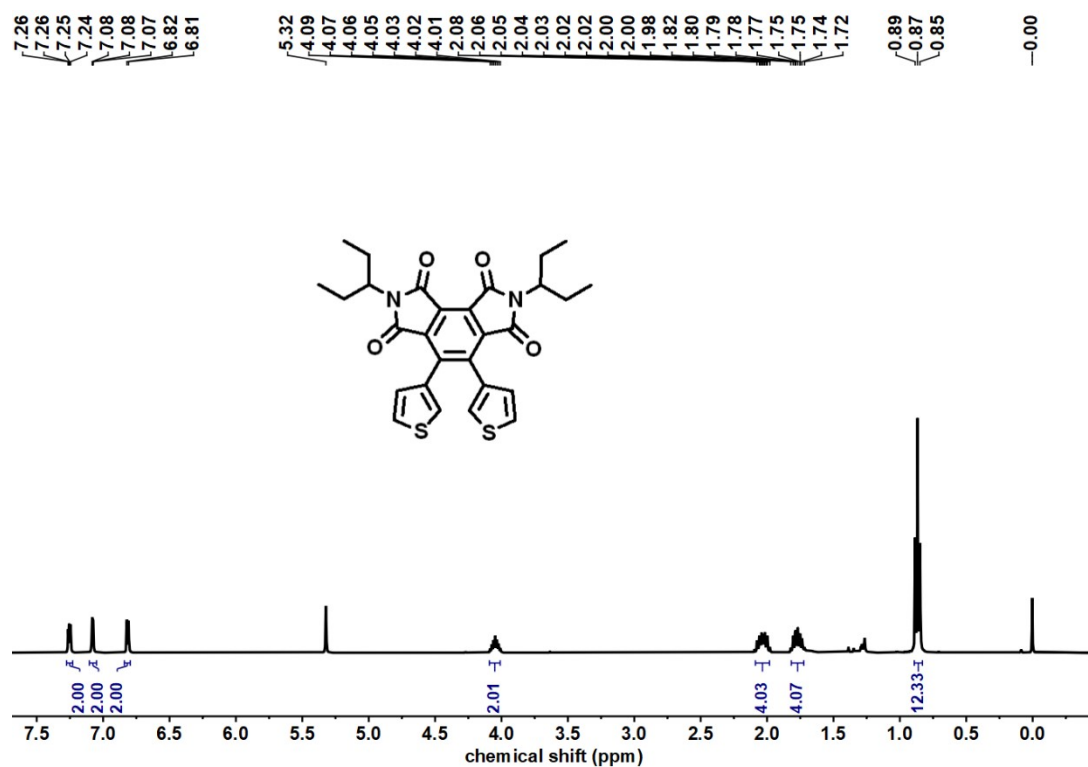

Fig. S11 <sup>1</sup>H NMR spectra of compound 2a in CD<sub>2</sub>Cl<sub>2</sub> (298 K).

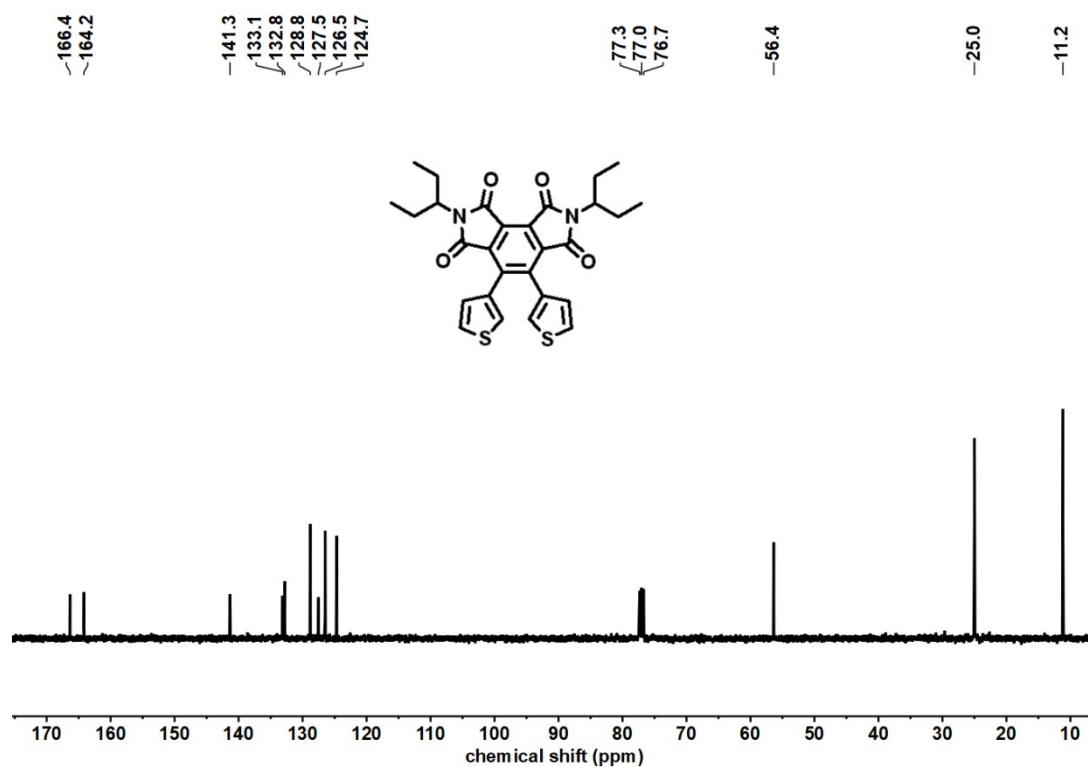

**Fig. S12** <sup>13</sup>CNMR spectra of compound 2a in CDCl<sub>3</sub> (298 K).

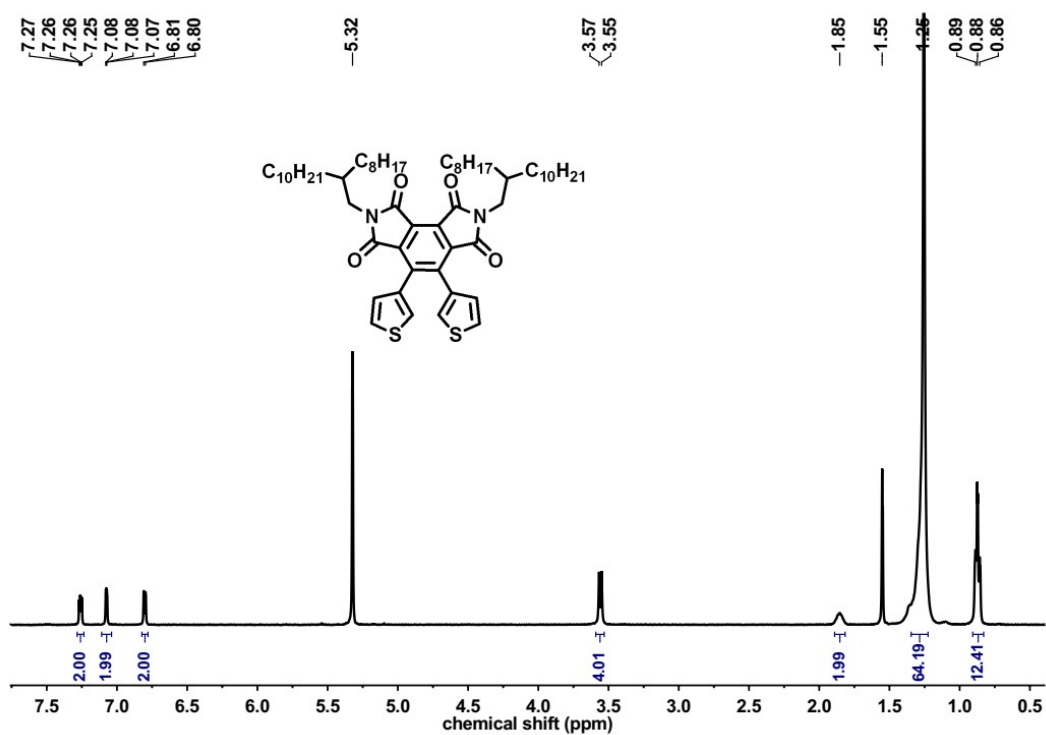

**Fig. S13** <sup>1</sup>HNMR spectra of compound 2b in CD<sub>2</sub>Cl<sub>2</sub> (298 K).

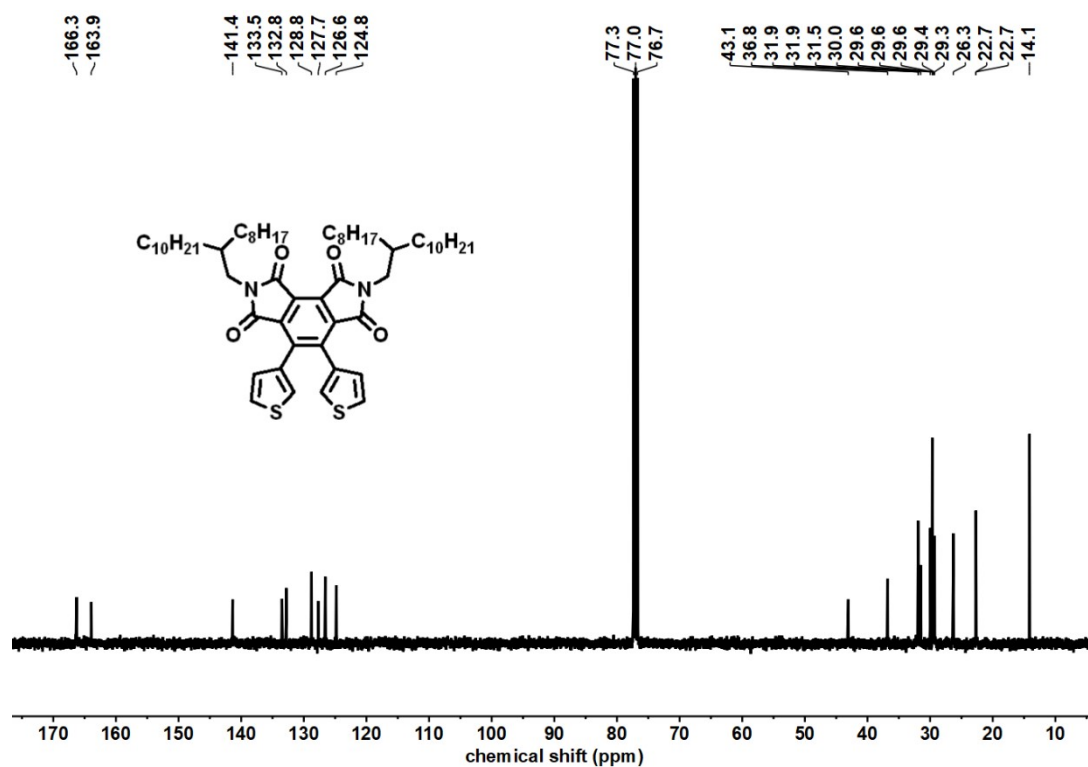

Fig. S14 <sup>13</sup>CNMR spectra of compound 2b in CDCl<sub>3</sub> (298 K).

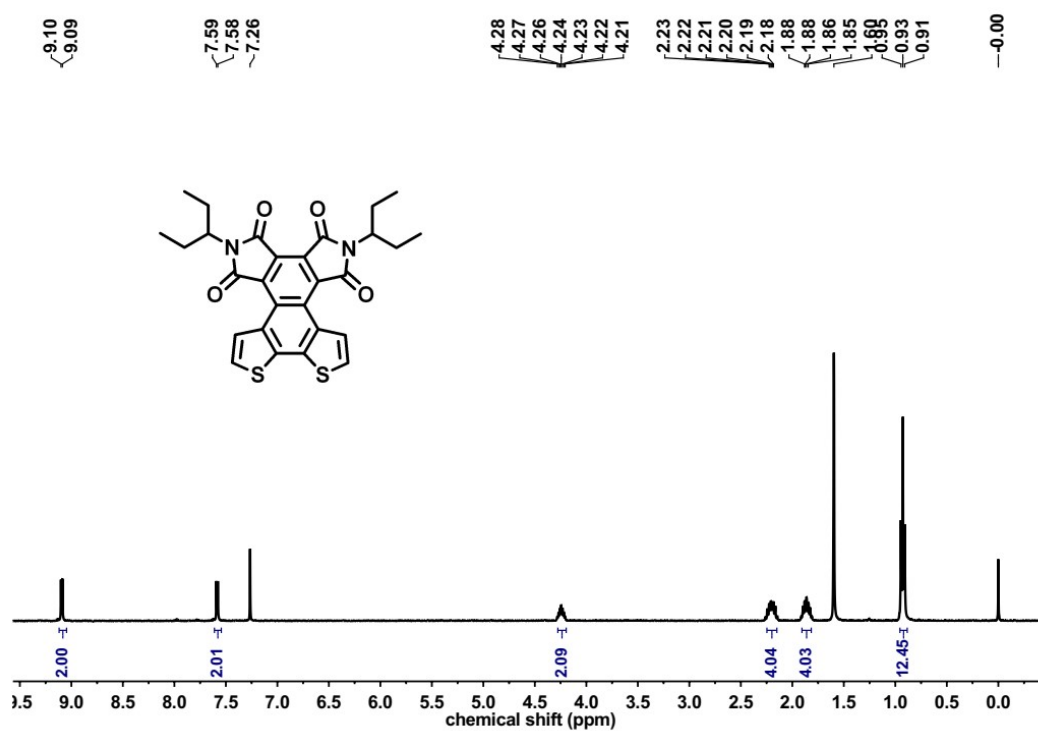

Fig. S15 <sup>1</sup>HNMR spectra of compound 3a in CDCl<sub>3</sub> (298 K).

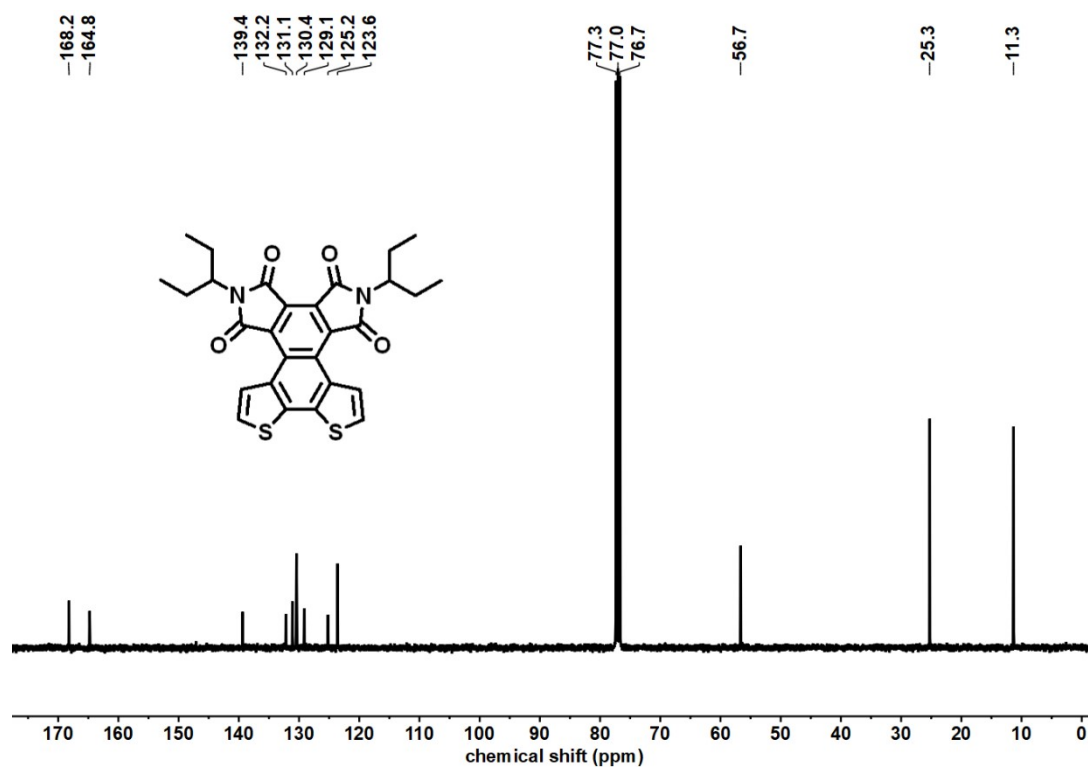

**Fig. S16**  $^{13}\text{C}$ NMR spectra of compound 3a in  $\text{CDCl}_3$  (298 K).

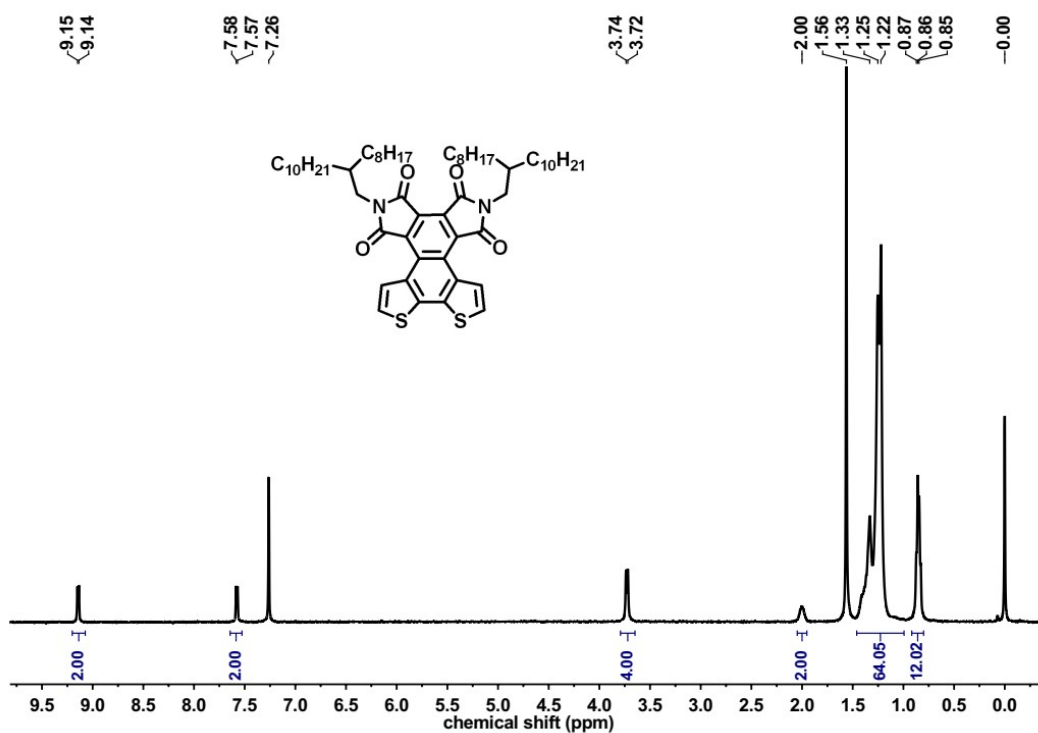

**Fig. S17**  $^1\text{H}$ NMR spectra of compound 3b in  $\text{CDCl}_3$  (298 K).



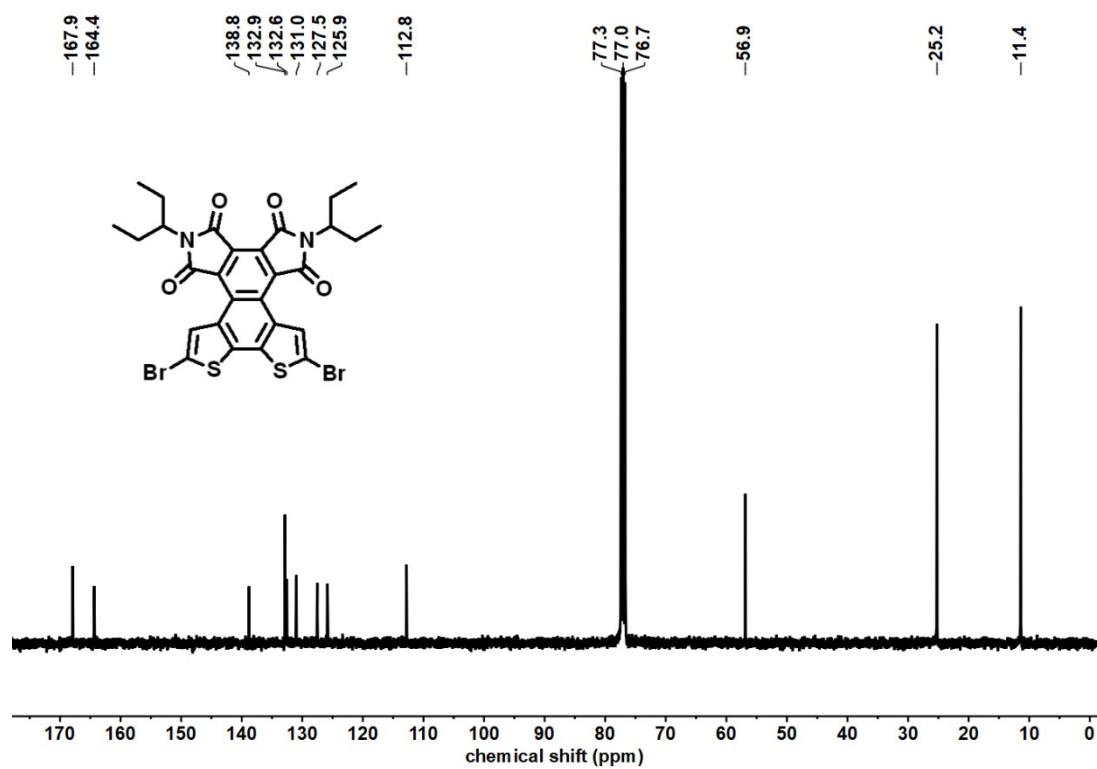

Fig. S20  $^{13}\text{C}$ NMR spectra of compound 4b in  $\text{CDCl}_3$  (298 K).

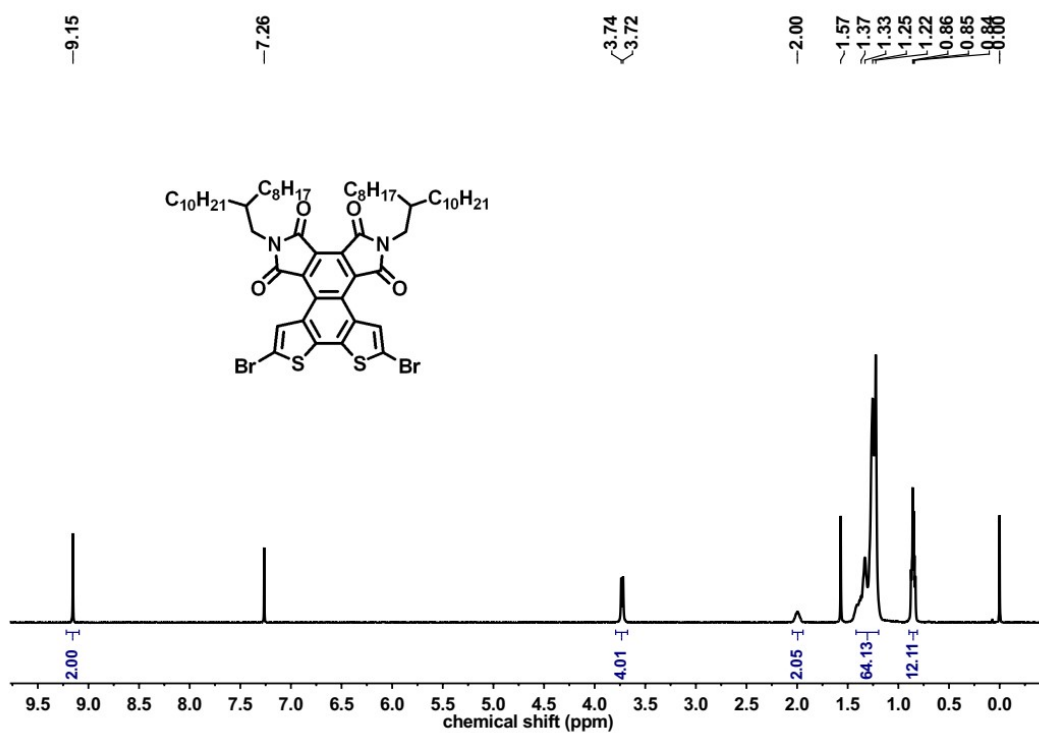

Fig. S21  $^1\text{H}$ NMR spectra of compound 4b in  $\text{CDCl}_3$  (313 K).

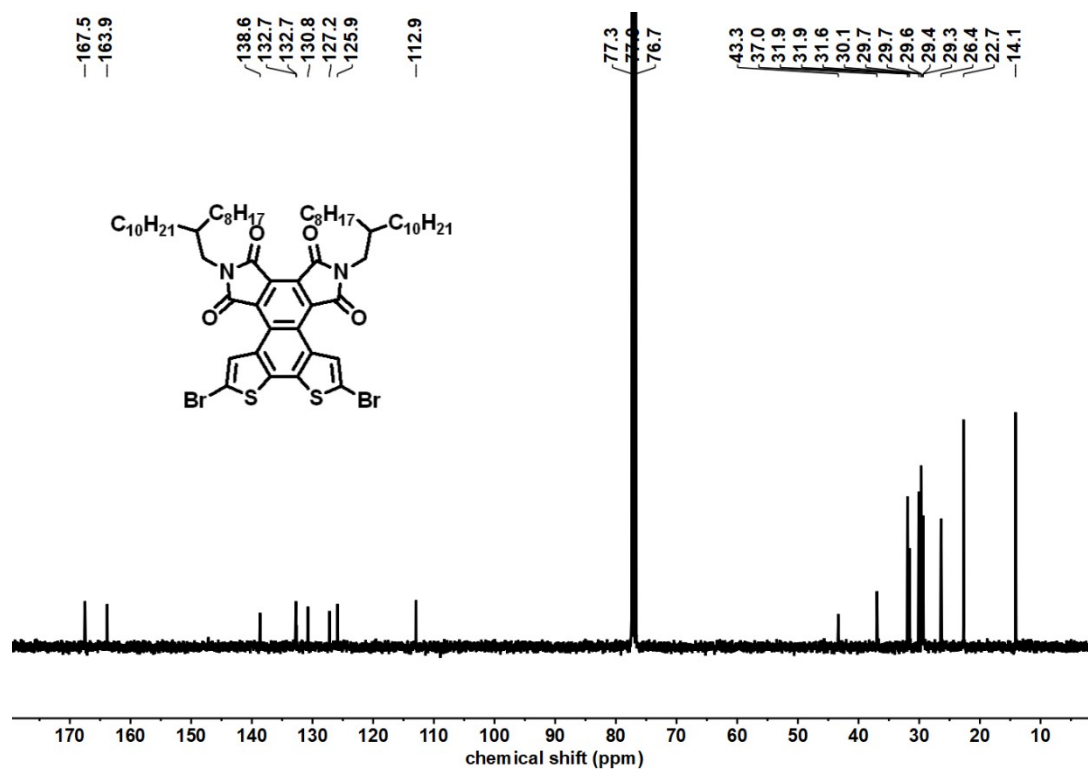

**Fig. S22** <sup>13</sup>CNMR spectra of compound 4b in CDCl<sub>3</sub> (298 K)

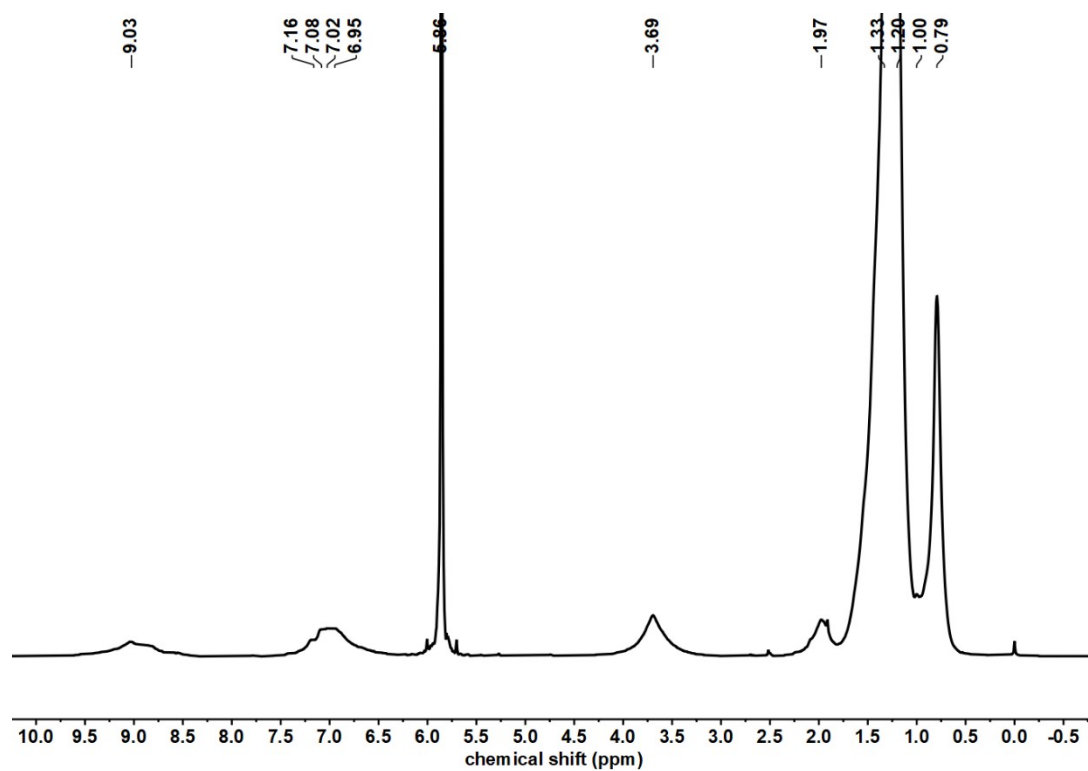

**Fig. S23** <sup>1</sup>HNMR spectra of polymer PNTI-BT in C<sub>2</sub>D<sub>2</sub>Cl<sub>4</sub> (373 K).

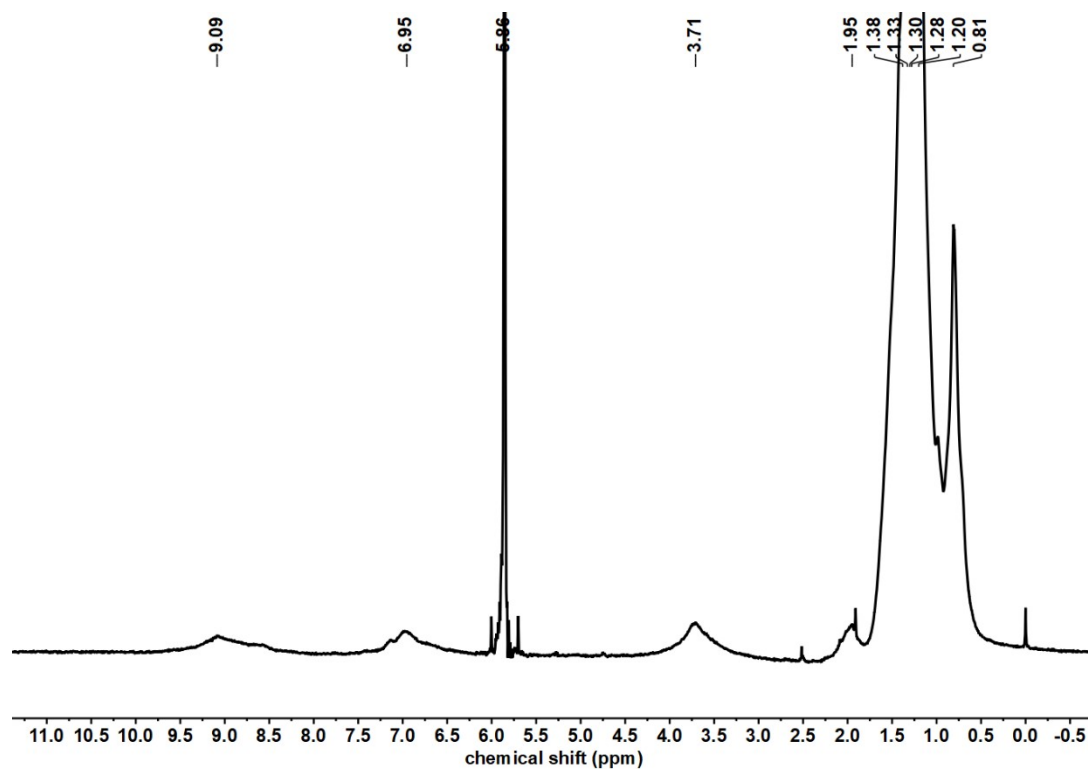

**Fig. S24**  $^1\text{H}$ NMR spectra of polymer PNTI-FBT in  $\text{C}_2\text{D}_2\text{Cl}_4$  (373 K).

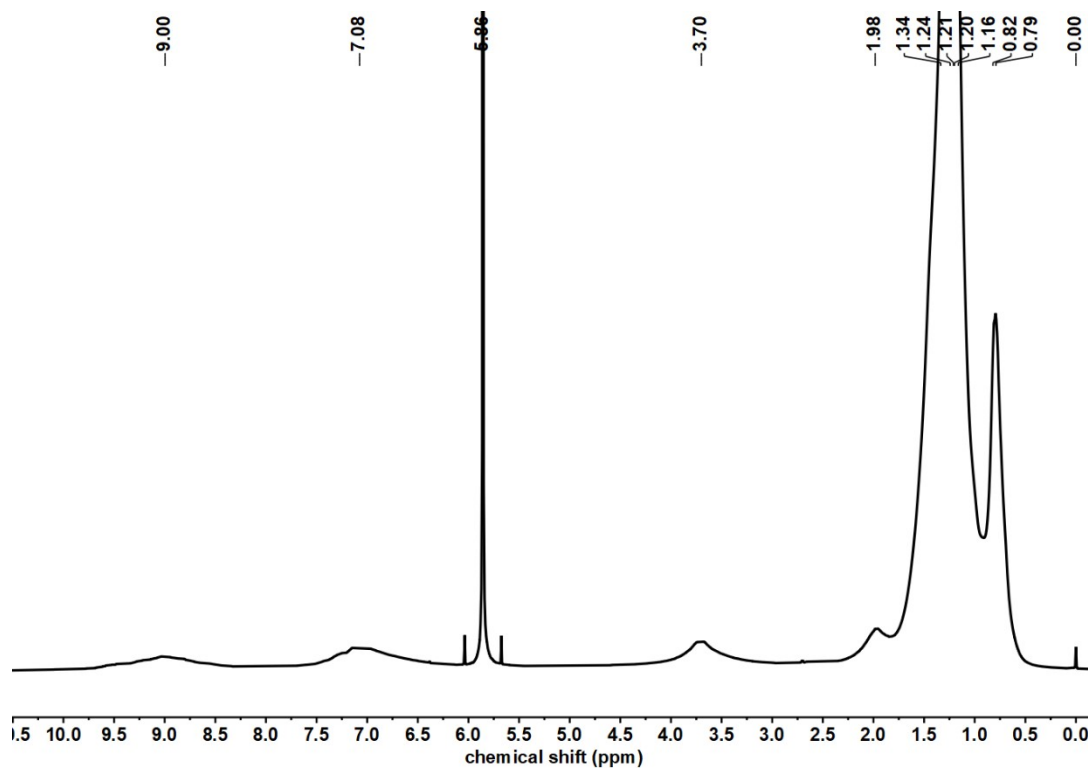

**Fig. S25**  $^1\text{H}$ NMR spectra of polymer PNTI-BS in  $\text{C}_2\text{D}_2\text{Cl}_4$  (373 K).

## 12. References

- (1) O.V. Dolomanov, L.J. Bourhis, R. J. Gildea, J. A. K. Howard, H. Puschmann, *J. Appl. Cryst.*, **2009**, *42*, 339–341.
- (2) G. M. Sheldrick, *Acta Cryst.*, **2008**, *A64*, 112–122.
- (3) G. M. Sheldrick, *Acta Cryst.*, **2015**, *C71*, 3–8.
- (4) M. J. Frisch, et al. Gaussian 09, Revision B.04; Gaussian, Inc.: Pittsburgh, PA, 2009.
- (5) C. Adamo, V. Barone, *J. Chem. Phys.*, **1999**, *110*, 6158–6170.
- (6) J. Tomasi, B. Mennucci, R. Cammi, *Chem. Rev.*, **2005**, *105*, 2999–3093.
- (7) Y. Zhao, C. A. Di, X. K. Gao, Y. B. Hu, Y. L. Guo, L. Zhang, Y. Q. Liu, Z. H. Wang, W. P. Hu, D. B. Zhu. *Adv. Mater.*, **2011**, *23*, 2448–2453.
